# Supplementary material
Source: publisher site journal article supplement (https://www.dovepress.com/article/295381)
Supplement: Supplementary file 1 [file get_supplementary_file.php]

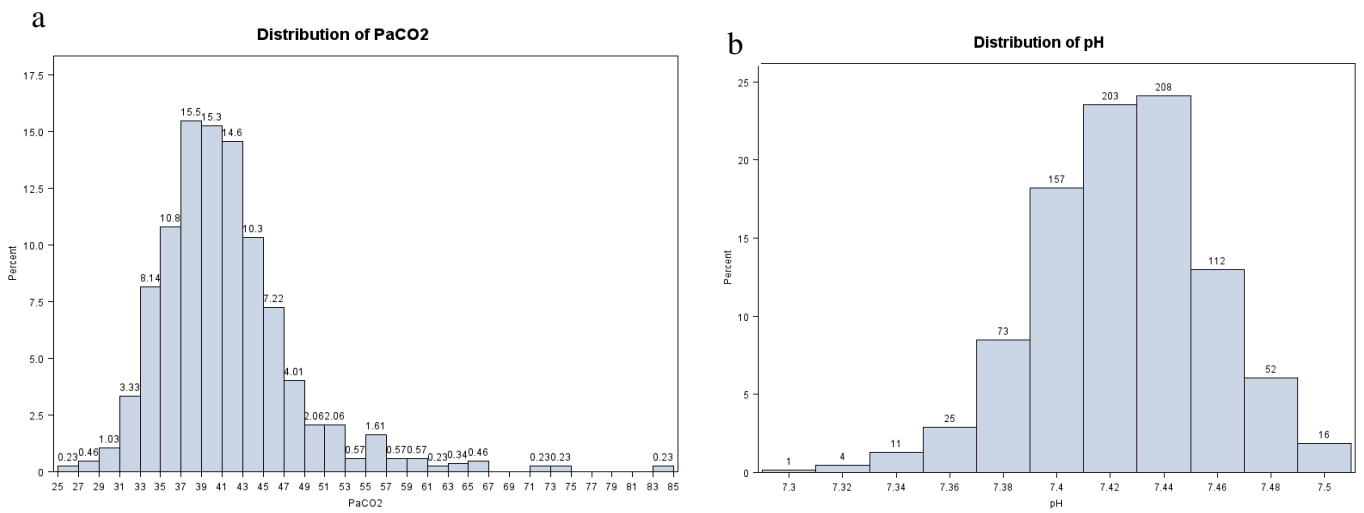

**Figure S1 : Distribution of PaCO<sub>2</sub> (a) and distribution of pH (b)**

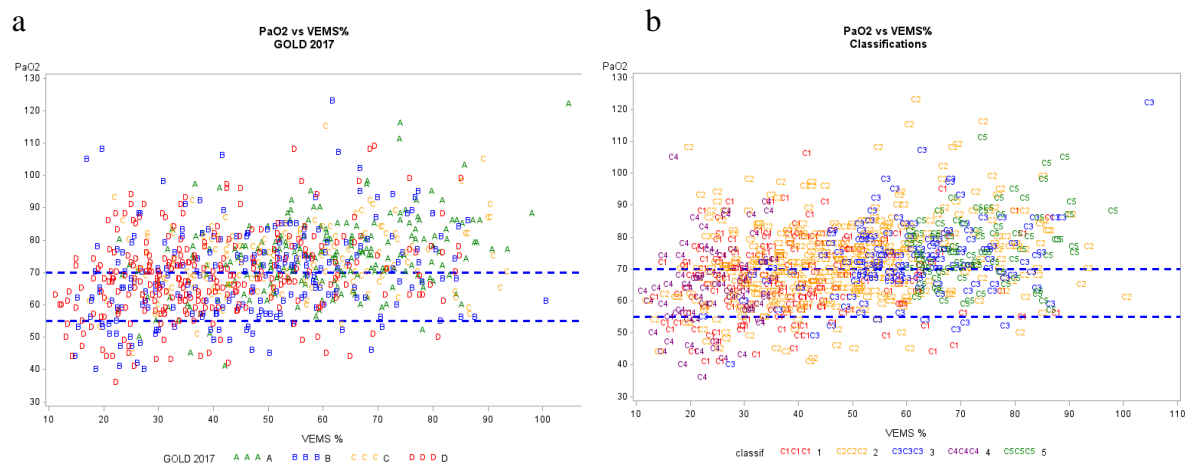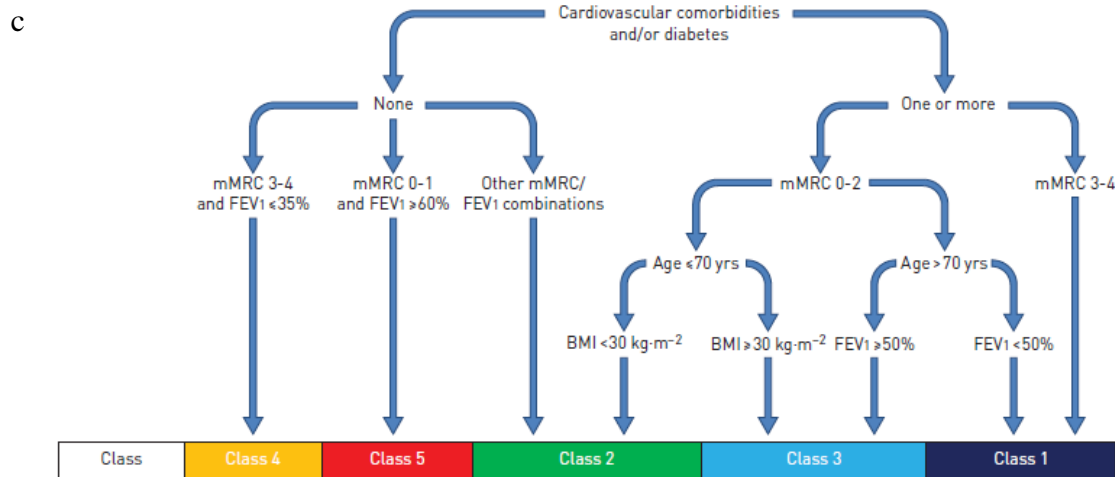

**Figure S2: a. Relationships between PaO<sub>2</sub> and FEV<sub>1</sub>, with GOLD 2017 ABCD stage.** GOLD A: green, GOLD B: blue, GOLD C: yellow, GOLD D: red. **b. Relationships between PaO<sub>2</sub> and FEV<sub>1</sub>, with CART 1 to 5 distribution.** CART 1: red, CART 2: yellow, CART 3: blue, CART 4: purple, CART 5: green. **c. Algorithm developed by classification and regression tree (CART) analysis for the classification of chronic obstructive pulmonary disease (COPD) patients, from Burgel *et al.* (9).**

**Table S1: Comparison between COPD subjects with and without arterial blood gas**

|                                          | <b>ABG</b>          | <b>No ABG</b>       | <b><i>p</i></b> |
|------------------------------------------|---------------------|---------------------|-----------------|
| <b>n, %</b>                              | 887                 | 294                 |                 |
| <b>Age, yr</b>                           | 64 [57-72]          | 65 [57-71]          | NS              |
| <b>Sex, M/F</b>                          | 653/234             | 206/88              | NS              |
| <b>Smoking, pack-yr</b>                  | 40 [25-59]          | 40 [26-54]          | NS              |
| <b>BMI &lt;18,5 kg.m<sup>-2</sup></b>    | 9.1% (81)           | 7.5% (22)           | 0,02            |
| <b>BMI &gt; 30 kg.m<sup>-2</sup></b>     | 22.7% (201)         | 22.1% (65)          | NS              |
| <b>Exacerbations in previous year, n</b> | 1 [0-2]             | 1 [0-3]             | 0.01            |
| <b>History of asthma</b>                 | 14.1% (125)         | 14.1% (125)         | NS              |
| <b>Hypertension</b>                      | 38.8% (344)         | 42.5% (125)         | NS              |
| <b>Coronary artery disease</b>           | 13.9% (123)         | 10.9% (32)          | NS              |
| <b>Heart failure</b>                     | 11.4% (101)         | 9.5% (28)           | NS              |
| <b>Diabetes</b>                          | 14.2% (126)         | 14.3% (42)          | NS              |
| <b>Obstructive Sleep Apnea</b>           | 9.7% (86)           | 7.5% (22)           | NS              |
| <b>mMRC scale</b>                        | 2 [1-3]             | 1 [1-2]             | <0.0001         |
| <b>FEV<sub>1</sub>, % predicted</b>      | 48 [33-63]          | 64 [46-75]          | <0.0001         |
| <b>FVC, % predicted</b>                  | 82 [68-98]          | 91 [77-106]         | <0.0001         |
| <b>RV, % predicted</b>                   | 165.9 [131.2-208.6] | 151.1 [121.2-191.3] | 0.0007          |
| <b>TLC, % predicted</b>                  | 113.2 [100.0-129.1] | 112.7 [97.5-122.8]  | NS              |
| <b>RV/TLC, %</b>                         | 56.8 [48.5-64.8]    | 52.1 [41.6-59.0]    | 0.0001          |
| <b>SGRQ</b>                              | 37 [23-52]          | 47 [33-60]          | <0.0001         |
| <b>Death</b>                             | 8.9% (79)           | 7.5% (22)           | NS              |

n (%) or median [interquartiles]. ABG: Arterial Blood Gas, BMI: Body Mass Index, FEV1: Forced Expiratory Volume in 1 second, FVC: Forced Vital Capacity, mMRC: modified Medical Research Council, NS : non significant, RV: Residual Volume, SGRQ: Saint Georges Respiratory Questionnaire, TLC: Total Lung Capacity
